# Supplementary material for: Transcriptional Profiling in Pathogenic and Non-Pathogenic SIV Infections Reveals Significant Distinctions in Kinetics and Tissue Compartmentalization
Source: PLoS Pathog. 2009 Feb 13;5(2):e1000296. doi: 10.1371/journal.ppat.1000296 (PMC2633618; doi:10.1371/journal.ppat.1000296)
Supplement: Table S1 — Cell death genes (0.02 MB XLS) [file ppat.1000296.s005.xls]

## Sheet: Sheet1
Supplemental Table 1 (from Fig. 3B): Cell death genes (d10 LN species ANOVA)
Death receptor signaling
Accession #	Primary Sequence Name	Sequence Description
NM_001556	IKBKB	N-acylsphingosine amidohydrolase (acid ceramidase) 1
NM_001004426	PLA2G6	BCL2-associated athanogene 3
NM_003806	HRK	BCL2/adenovirus E1B 19kDa interacting protein 1
NM_000826	GRIA2	BCL2/adenovirus E1B 19kDa interacting protein 1
NM_004315	ASAH1	BCL2/adenovirus E1B 19kDa interacting protein 1
NM_080717	TBX5	Bruton agammaglobulinemia tyrosine kinase
NM_016459	MGC29506	CASP8 and FADD-like apoptosis regulator
NM_170744	UNC5B	GA binding protein transcription factor, beta subunit 2
NM_003789	TRADD	GA binding protein transcription factor, beta subunit 2
NM_000455	STK11	Glutamate receptor, ionotropic, AMPA 2
NM_052815	IER3	Hexokinase 2
NM_003897	IER3	Harakiri, BCL2 interacting protein (contains only BH3 domain)
NM_001205	BNIP1	Immediate early response 3
NM_013979	BNIP1	Immediate early response 3
NM_004281	BAG3	Inhibitor of kappa light polypeptide gene enhancer in B-cells, kinase beta
NM_181427	GABPB2	hypothetical protein MGC29506
NM_002041	GABPB2	Nuclear factor of kappa light polypeptide gene enhancer in B-cells inhibitor, beta
NM_001001716	NFKBIB	Phospholipase A2, group VI (cytosolic, calcium-independent)
NM_013978	BNIP1	Serine/threonine kinase 11
NM_003879	CFLAR	T-box 5
NM_000061	BTK	TNFRSF1A-associated via death domain
NM_000189	HK2	Unc-5 homolog B (C. elegans)
Apoptosis
Accession #	Primary Sequence Name	Sequence Description
NM_007027	TOPBP1	Calcium/calmodulin-dependent protein kinase (CaM kinase) II delta
NM_002614	PDZK1	Calcium/calmodulin-dependent protein kinase (CaM kinase) II delta
NM_019892	INPP5E	Insulin-degrading enzyme
NM_004969	IDE	Inositol polyphosphate-5-phosphatase, 72 kDa
NM_172127	CAMK2D	Lectin, galactoside-binding, soluble, 3
NM_172115	CAMK2D	PDZ domain containing 1
NM_002306	LGALS3	Topoisomerase (DNA) II binding protein 1
Cell cycle arrest/ progression
Accession #	Primary Sequence Name	Sequence Description
NM_018237	CCAR1	AXL receptor tyrosine kinase
NM_007027	TOPBP1	Cell division cycle and apoptosis regulator 1
NM_006904	PRKDC	Cell division cycle 42 (GTP binding protein, 25kDa)
NM_001418	EIF4G2	Cyclin-dependent kinase inhibitor 2D (p19, inhibits CDK4)
NM_007182	RASSF1	CCAAT/enhancer binding protein (C/EBP), alpha
NM_006271	S100A1	Dual specificity phosphatase 5
NM_000964	RARA	Eukaryotic translation initiation factor 4 gamma, 2
NM_000455	STK11	Enolase 1, (alpha)
NM_001800	CDKN2D	V-myc myelocytomatosis viral related oncogene, neuroblastoma derived (avian)
NM_001699	AXL	Homo sapiens promyelocytic leukemia (PML), transcript variant 9, mRNA.
NM_005378	MYCN	Promyelocytic leukemia
NM_004419	DUSP5	Protein kinase, DNA-activated, catalytic polypeptide
NM_006761	YWHAE	Retinoic acid receptor, alpha
NM_001428	ENO1	Ras association (RalGDS/AF-6) domain family 1
NM_004364	CEBPA	S100 calcium binding protein A1
NM_033240	PML	Serine/threonine kinase 11
NM_033242	PML	Topoisomerase (DNA) II binding protein 1
NM_001791	CDC42	Tyrosine 3-monooxygenase/tryptophan 5-monooxygenase activation protein, epsilon polypeptide
Caspase activation
Accession #	Primary Sequence Name	Sequence Description
NM_005131	THOC1	Azurocidin 1 (cationic antimicrobial protein 37)
NM_003234	TFRC	Carcinoembryonic antigen-related cell adhesion molecule 5
NM_002306	LGALS3	Endothelial cell growth factor 1 (platelet-derived)
NM_016459	MGC29506	Enolase 1, (alpha)
NM_001700	AZU1	Hexokinase 2
NM_001953	ECGF1	Lectin, galactoside-binding, soluble, 3
NM_001428	ENO1	Lamin B1
NM_002576	PAK1	hypothetical protein MGC29506
NM_005573	LMNB1	P21/Cdc42/Rac1-activated kinase 1 (STE20 homolog, yeast)
NM_000189	HK2	Transferrin receptor (p90, CD71)
NM_002483	CEACAM6	THO complex 1
DNA damage/repair
Accession #	Primary Sequence Name	Sequence Description
NM_007027	TOPBP1	Deoxyribonuclease I-like 3
NM_004944	DNASE1L3	O-6-methylguanine-DNA methyltransferase
NM_001034	RRM2	RAD51-like 3 (S. cerevisiae)
NM_006761	YWHAE	Ribonucleotide reductase M2 polypeptide
NM_002878	RAD51L3	Topoisomerase (DNA) II binding protein 1
NM_002412	MGMT	Tyrosine 3-monooxygenase/tryptophan 5-monooxygenase activation protein, epsilon polypeptide
Oxidative stress
Accession #	Primary Sequence Name	Sequence Description
NM_001933	DLST	Dihydrolipoamide S-succinyltransferase (E2 component of 2-oxo-glutarate complex)
NM_000570	FCGR3B	Fc fragment of IgG, low affinity IIIa, receptor (CD16a)
NM_002064	GLRX	Glutaredoxin (thioltransferase)
NM_002259	KLRC1	Killer cell lectin-like receptor subfamily C, member 1
NM_000636	SOD2	Superoxide dismutase 2, mitochondrial
AV649856	SOD2	Transcribed locus
NM_003330	TXNRD1	Thioredoxin reductase 1
